# Supplementary material for: Molecular Characterization of Porcine Epidemic Diarrhea Virus from Field Samples in South Korea
Source: MDPI journal article supplement (doi:10.3390/v15122428), 2023-12-14
Supplement: s1 [file s1]

**Supplementary Table S1. Information of PEDV positive samples in this study.**

| <b>Name</b> | <b>Sample</b> | <b>Date</b> | <b>Province</b> | <b>List of vaccines</b> | <b>GenBank</b> |
|-------------|---------------|-------------|-----------------|-------------------------|----------------|
| CNU-22S11   | Fecal swab    | Aug-2022    | Jeonbuk         | PRRSV, PRoV, PEDV       | OR529200       |
| CNU-22S16   | Fecal swab    | Aug-2022    | Jeonbuk         | PRRSV, PRoV, PEDV       | OR529201       |
| CNU-22S17   | Fecal swab    | Aug-2022    | Jeonbuk         | PRRSV, PRoV, PEDV       | OR529202       |
| CNU-22P1    | Feces         | Sep-2022    | Chungnam        | PRRSV, PRoV, PEDV       | OR529203       |
| CNU-22P2    | Feces         | Sep-2022    | Chungnam        | PRRSV, PRoV, PEDV       | OR529204       |
| CNU-22P4    | Feces         | Sep-2022    | Chungnam        | PRRSV, PRoV, PEDV       | OR529205       |
